# Supplementary material for: Contribution of low population immunity to the severe Omicron BA.2 outbreak in Hong Kong
Source: PubMed Central journal article supplement (PMC9232516; doi:10.1038/s41467-022-31395-0), 2022-06-24
Supplement: 41467_2022_31395_MOESM2_ESM.pdf [file 41467_2022_31395_MOESM2_ESM.pdf]

## **Description of Additional Supplementary Files**

File Name: Supplementary Data 1

Description: Details of sequences used in the time-resolved phylogenetic tree
